# Supplementary material
Source: publisher figshare collection journal article supplement (https://gsajournals.figshare.com/ndownloader/files/22074951)
Supplement: Supplementary file 1 [file 22074951]

| **Plasmid Name** | **Gene of interest** | **Selection antibiotic** | **Secondary selection antibiotic** |
| --- | --- | --- | --- |
| pMS003 | tdTomato | G418 | Ampicillin |
| pMS004 | tdTomato | Hygromycin | Ampicillin |
| pMS005 | GFP | Phleomycin | Ampicillin |
| pMS007 | Cyan FP | Blasticidin | Ampicillin |
| pMS008 | GFP | G418 | Ampicillin |
| pMS009 | mNeonGreen | G418 | Ampicillin |
| pMS015 | tdTomato | Blasticidin | Ampicillin |
| pMS016 | GFP | Hygromycin | Ampicillin |
| pMS017 | mNeonGreen | Hygromycin | Ampicillin |
| pMS018 | Cyan FP | Hygromycin | Ampicillin |
| pMS019 | mNeonGreen | Phleomycin | Ampicillin |
| pMS020 | GFP | Blasticidin | Ampicillin |
| pMS021 | mNeonGreen | Blasticidin | Ampicillin |
| pMS022 | Cyan FP | Phleomycin | Ampicillin |

**Supplementary Table S1 – A list of plasmids produced in this work allowing the expression of a fluorescent protein in *Herpetomonas muscarum***
